# Supplementary material for: Intestinal Microbes of Hooded Cranes (Grus monacha) Wintering in Three Lakes of the Middle and Lower Yangtze River Floodplain
Source: MDPI journal article supplement (doi:10.3390/ani11051390), 2021-05-13
Supplement: s1 [file s1]

## Supplementary Materials:

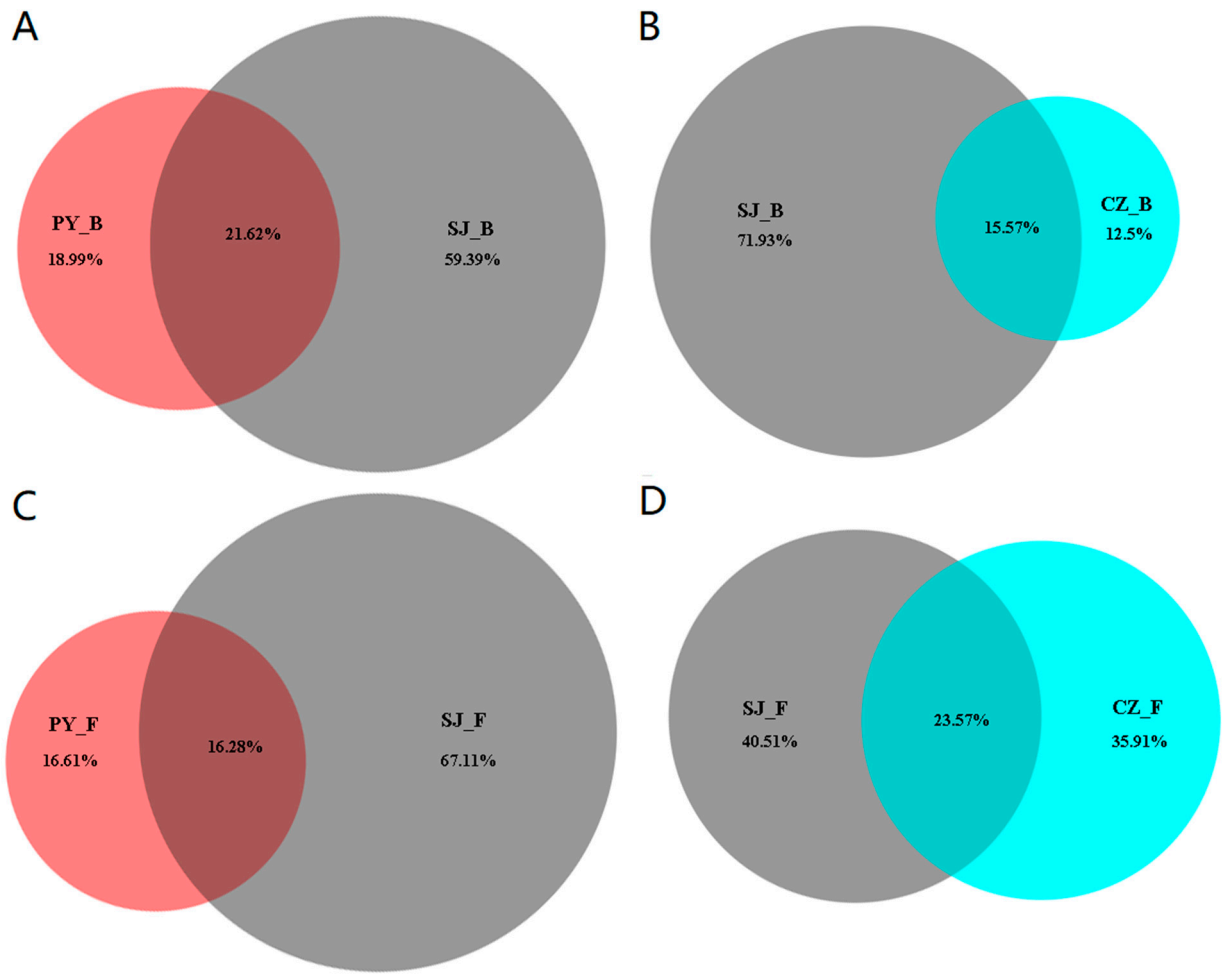

**Figure S1.** Venn diagram showing the unique and shared intestinal bacterial (A and B) and fungal (C and D) ASVs of Hooded Cranes at different lake groups . PY: Poyang lake; CZ: Caizi Lake; SJ: Shengjin Lake; B: bacteria; F: fungus.

**Table S1.** The distribution of data was analyzed by Kolmogorov-Smirnov test. PY: Poyang Lake; SJ: Shengjin Lake; CZ: Caizi Lake. Normal distribution:  $p > 0.05$ ; Non-normal distribution:  $p \leq 0.05$ .

| Lake group | Treatment                      | Kolmogorov-Smirnov test<br>( <i>P</i> value) | Distribution |
|------------|--------------------------------|----------------------------------------------|--------------|
| PY vs. SJ  | Bacterial ASV richness         | 0.120                                        | Normal       |
|            | Bacterial Shannon index        | 0.324                                        | Normal       |
|            | Fungal ASV richness            | 0.103                                        | Normal       |
|            | Fungal Shannon index           | 0.466                                        | Normal       |
|            | Bacterial Firmicutes Phyla     | 0.321                                        | Normal       |
|            | Bacterial Proteobacteria Phyla | 0.134                                        | Normal       |
|            | Bacterial Actinobacteria Phyla | 0.035                                        | Non-normal   |
|            | Bacterial Bacteroidetes Phyla  | <0.001                                       | Non-normal   |
|            | Fungal Ascomycota Phyla        | 0.052                                        | Normal       |
|            | Fungal Basidiomycota Phyla     | 0.003                                        | Non-normal   |
|            | Fungal Mortierellomycota Phyla | <0.001                                       | Non-normal   |
| SJ vs. CZ  | Bacterial ASV richness         | 0.365                                        | Normal       |
|            | Bacterial Shannon index        | 0.738                                        | Normal       |
|            | Fungal ASV richness            | 0.509                                        | Normal       |
|            | Fungal Shannon index           | 0.303                                        | Normal       |
|            | Bacterial Firmicutes Phyla     | 0.876                                        | Normal       |
|            | Bacterial Proteobacteria Phyla | 0.769                                        | Normal       |
|            | Bacterial Actinobacteria Phyla | 0.445                                        | Normal       |
|            | Bacterial Bacteroidetes Phyla  | <0.001                                       | Non-normal   |
|            | Fungal Ascomycota Phyla        | 0.095                                        | Normal       |
|            | Fungal Basidiomycota Phyla     | 0.277                                        | Normal       |
|            | Fungal Mortierellomycota Phyla | 0.006                                        | Non-normal   |

**Table S2.** The relative abundance of the intestinal bacterial genera shared by the Hooded Cranes at different lake groups. The genus with a relative abundance of more than 0.01% are listed. The generic names that are the same are distinguished by family names in the bracket. PY: Poyang Lake; SJ: Shengjin Lake; CZ: Caizi Lake; B: bacteria.

| PY_B vs. SJ_B                              |                        |       | SJ_B vs. CZ_B                        |                        |       |
|--------------------------------------------|------------------------|-------|--------------------------------------|------------------------|-------|
| Genus                                      | Relative abundance (%) |       | Genus                                | Relative abundance (%) |       |
|                                            | PY_B                   | SJ_B  |                                      | SJ_B                   | CZ_B  |
| <i>Lactobacillus</i>                       | 85.27                  | 31.18 | <i>Lactobacillus</i>                 | 31.18                  | 48.61 |
| <i>Pseudomonas</i>                         | 2.53                   | 0.32  | <i>Paenibacillus</i>                 | 5.87                   | 0.03  |
| <i>Escherichia</i>                         | 2.42                   | 0.32  | <i>Clostridium</i>                   | 3.16                   | 0.15  |
| <i>Bacillus</i>                            | 0.64                   | 5.70  | <i>Nocardioides</i>                  | 2.77                   | 0.06  |
| <i>Methylobacterium</i>                    | 0.49                   | 0.84  | <i>Streptococcus</i>                 | 2.65                   | 0.02  |
| <i>Mycobacterium</i>                       | 0.38                   | 0.82  | <i>Arthrobacter</i>                  | 2.53                   | 0.11  |
| <i>Martelella</i>                          | 0.33                   | 0.14  | <i>Clostridium</i> (Clostridiaceae)  | 1.66                   | 2.57  |
| <i>Clostridium</i> (Clostridiaceae)        | 0.26                   | 1.66  | <i>Streptomyces</i>                  | 1.03                   | 0.28  |
| <i>Acinetobacter</i>                       | 0.23                   | 0.08  | <i>Methylobacterium</i>              | 0.84                   | 0.40  |
| <i>Streptococcus</i>                       | 0.19                   | 2.65  | <i>Mycobacterium</i>                 | 0.82                   | 0.08  |
| <i>Campylobacter</i>                       | 0.15                   | 0.13  | <i>Massilia</i>                      | 0.74                   | 0.02  |
| <i>Clostridium</i> (Peptostreptococcaceae) | 0.15                   | 3.16  | <i>Enterococcus</i>                  | 0.39                   | 19.41 |
| <i>Megamonas</i>                           | 0.15                   | 0.32  | <i>Pseudomonas</i>                   | 0.32                   | 2.87  |
| <i>Enterococcus</i>                        | 0.14                   | 0.39  | <i>Megamonas</i>                     | 0.32                   | 0.02  |
| <i>Bacteroides</i>                         | 0.11                   | 0.34  | <i>Rhizobium</i>                     | 0.31                   | 0.01  |
| <i>Lactococcus</i>                         | 0.10                   | 0.02  | <i>Terracoccus</i>                   | 0.30                   | 0.01  |
| <i>Paenibacillus</i>                       | 0.10                   | 5.87  | <i>Turicibacter</i>                  | 0.29                   | 0.02  |
| <i>Nocardioides</i>                        | 0.09                   | 2.77  | <i>BSV43</i>                         | 0.24                   | 0.02  |
| <i>Solirubrobacter</i>                     | 0.07                   | 0.12  | <i>Pedobacter</i>                    | 0.18                   | 0.03  |
| <i>Aurantimonas</i>                        | 0.07                   | 0.05  | <i>Rhodococcus</i>                   | 0.15                   | 0.39  |
| <i>Planctomyces</i>                        | 0.07                   | 0.23  | <i>Martelella</i>                    | 0.14                   | 1.85  |
| <i>Rhizobium</i>                           | 0.07                   | 0.31  | <i>Pelosinus</i>                     | 0.14                   | 0.38  |
| <i>Streptomyces</i>                        | 0.06                   | 1.03  | <i>Campylobacter</i>                 | 0.13                   | 0.24  |
| <i>Rothia</i>                              | 0.06                   | 0.01  | <i>Acidovorax</i>                    | 0.07                   | 0.18  |
| [ <i>Clostridium</i> ]                     | 0.06                   | 0.05  | <i>Microbacterium</i>                | 0.06                   | 0.25  |
| <i>Microbacterium</i>                      | 0.06                   | 0.06  | <i>Aurantimonas</i>                  | 0.05                   | 0.06  |
| <i>Clostridium</i> (Lachnospiraceae)       | 0.05                   | 0.04  | [ <i>Clostridium</i> ]               | 0.05                   | 0.06  |
| <i>Labrys</i>                              | 0.05                   | 0.06  | <i>Actinomycetospora</i>             | 0.05                   | 0.01  |
| <i>Faecalibacterium</i>                    | 0.04                   | 1.51  | <i>Clostridium</i> (Lachnospiraceae) | 0.04                   | 0.12  |
| <i>Rhodococcus</i>                         | 0.03                   | 0.15  | <i>Intrasporangium</i>               | 0.03                   | 0.01  |
| <i>Nostocoida</i>                          | 0.03                   | 0.12  | <i>Sphingomonas</i>                  | 0.02                   | 0.01  |
| <i>Hyphomicrobium</i>                      | 0.03                   | 0.62  | <i>Lactococcus</i>                   | 0.02                   | 0.50  |
| <i>Actinomycetospora</i>                   | 0.03                   | 0.05  | <i>Frigoribacterium</i>              | 0.02                   | 0.05  |
| <i>Massilia</i>                            | 0.03                   | 0.74  | <i>Corynebacterium</i>               | 0.01                   | 0.02  |
| <i>Afipia</i>                              | 0.03                   | 0.41  | <i>Kaistia</i>                       | 0.01                   | 0.22  |

|                              |      |      |                     |      |      |
|------------------------------|------|------|---------------------|------|------|
| <i>Rhodoblastus</i>          | 0.03 | 0.07 | <i>Butyricoccus</i> | 0.01 | 0.08 |
| <i>Arthrobacter</i>          | 0.02 | 2.53 | —                   | —    | —    |
| <i>Candidatus Solibacter</i> | 0.02 | 0.02 | —                   | —    | —    |
| <i>Kaistia</i>               | 0.02 | 0.01 | —                   | —    | —    |
| <i>Mesorhizobium</i>         | 0.02 | 0.07 | —                   | —    | —    |
| <i>Balneimonas</i>           | 0.02 | 0.04 | —                   | —    | —    |
| <i>Sphingomonas</i>          | 0.02 | 0.02 | —                   | —    | —    |
| <i>Butyricoccus</i>          | 0.02 | 0.01 | —                   | —    | —    |
| <i>A17</i>                   | 0.01 | 0.10 | —                   | —    | —    |
| <i>Methylosinus</i>          | 0.01 | 0.10 | —                   | —    | —    |
| <i>Corynebacterium</i>       | 0.01 | 0.01 | —                   | —    | —    |
| <i>Actinoallomurus</i>       | 0.01 | 0.03 | —                   | —    | —    |
| <i>Azorhizobium</i>          | 0.01 | 0.02 | —                   | —    | —    |
| <i>Alicyclobacillus</i>      | 0.01 | 0.14 | —                   | —    | —    |
| <i>Turicibacter</i>          | 0.01 | 0.29 | —                   | —    | —    |
| <i>Gemmata</i>               | 0.01 | 0.18 | —                   | —    | —    |
| <i>Pedobacter</i>            | 0.01 | 0.18 | —                   | —    | —    |

**Table S3.** The relative abundance of the intestinal fungal genera shared by the Hooded Cranes at different lake groups. The genus with a relative abundance of more than 0.01% are listed. PY: Poyang Lake; SJ: Shengjin Lake; CZ: Caizi Lake; F: fungi.

| PY_F vs. SJ_F            |                        |      | SJ_F vs. CZ_F            |                        |       |
|--------------------------|------------------------|------|--------------------------|------------------------|-------|
| Genus                    | Relative abundance (%) |      | Genus                    | Relative abundance (%) |       |
|                          | PY_F                   | SJ_F |                          | SJ_F                   | CZ_F  |
| <i>Otidea</i>            | 16.71                  | 0.54 | <i>Didymella</i>         | 18.07                  | 2.37  |
| <i>Emericellopsis</i>    | 7.23                   | 6.06 | <i>Fusarium</i>          | 7.08                   | 0.63  |
| <i>Pyrenochaetopsis</i>  | 6.84                   | 0.79 | <i>Cystofilobasidium</i> | 6.91                   | 0.13  |
| <i>Mortierella</i>       | 4.45                   | 2.75 | <i>Emericellopsis</i>    | 6.06                   | 0.09  |
| <i>Acremonium</i>        | 4.12                   | 0.42 | <i>Karstenula</i>        | 4.43                   | 1.20  |
| <i>Leucosporidium</i>    | 2.15                   | 0.49 | <i>Mortierella</i>       | 2.75                   | 0.11  |
| <i>Cystofilobasidium</i> | 1.43                   | 6.91 | <i>Penicillium</i>       | 2.24                   | 0.07  |
| <i>Epicoccum</i>         | 1.39                   | 0.91 | <i>Plectosphaerella</i>  | 1.55                   | 0.18  |
| <i>Cryptococcus</i>      | 0.84                   | 0.23 | <i>Cladosporium</i>      | 0.92                   | 6.10  |
| <i>Nigrospora</i>        | 0.84                   | 0.03 | <i>Epicoccum</i>         | 0.91                   | 10.01 |
| <i>Talaromyces</i>       | 0.50                   | 0.04 | <i>Pyrenochaetopsis</i>  | 0.79                   | 3.34  |
| <i>Neopestalotiopsis</i> | 0.40                   | 0.15 | <i>Otidea</i>            | 0.54                   | 1.28  |
| <i>Erythrobasidium</i>   | 0.32                   | 0.06 | <i>Leucosporidium</i>    | 0.49                   | 0.40  |
| <i>Sporobolomyces</i>    | 0.31                   | 0.35 | <i>Phoma</i>             | 0.47                   | 0.01  |
| <i>Fusarium</i>          | 0.30                   | 7.08 | <i>Acremonium</i>        | 0.42                   | 0.42  |
| <i>Dioszegia</i>         | 0.26                   | 0.07 | <i>Trichoderma</i>       | 0.39                   | 0.53  |
| <i>Podospora</i>         | 0.24                   | 0.76 | <i>Aspergillus</i>       | 0.38                   | 0.05  |
| <i>Thelebolus</i>        | 0.19                   | 0.11 | <i>Sporobolomyces</i>    | 0.35                   | 4.20  |
| <i>Cladosporium</i>      | 0.19                   | 0.92 | <i>Cryptococcus</i>      | 0.23                   | 0.17  |
| <i>Saitozyma</i>         | 0.14                   | 0.13 | <i>Neopestalotiopsis</i> | 0.15                   | 0.64  |
| <i>Collarina</i>         | 0.14                   | 0.01 | <i>Botrytis</i>          | 0.13                   | 0.08  |
| <i>Symmetrospora</i>     | 0.12                   | 0.02 | <i>Saitozyma</i>         | 0.13                   | 0.16  |
| <i>Trichoderma</i>       | 0.11                   | 0.39 | <i>Leptosphaeria</i>     | 0.13                   | 0.13  |
| <i>Periconia</i>         | 0.10                   | 0.01 | <i>Saccharicola</i>      | 0.13                   | 0.01  |
| <i>Plectosphaerella</i>  | 0.07                   | 1.55 | <i>Bullera</i>           | 0.12                   | 3.60  |
| <i>Bullera</i>           | 0.05                   | 0.12 | <i>Buckleyzyma</i>       | 0.10                   | 0.04  |
| <i>Penicillium</i>       | 0.05                   | 2.24 | <i>Vishniacozyma</i>     | 0.08                   | 0.15  |
| <i>Rhodotorula</i>       | 0.05                   | 0.04 | <i>Dioszegia</i>         | 0.07                   | 0.08  |
| <i>Pestalotiopsis</i>    | 0.04                   | 0.01 | <i>Holtermanniella</i>   | 0.07                   | 0.01  |
| <i>Aspergillus</i>       | 0.02                   | 0.38 | <i>Guehomyces</i>        | 0.07                   | 9.59  |
| <i>Septoria</i>          | 0.01                   | 1.24 | <i>Erythrobasidium</i>   | 0.06                   | 0.23  |
| <i>Botrytis</i>          | 0.01                   | 0.13 | <i>Cystobasidium</i>     | 0.06                   | 0.45  |
| —                        | —                      | —    | <i>Talaromyces</i>       | 0.04                   | 0.07  |
| —                        | —                      | —    | <i>Hannaella</i>         | 0.04                   | 0.31  |
| —                        | —                      | —    | <i>Rhodotorula</i>       | 0.04                   | 0.04  |
| —                        | —                      | —    | <i>Pseudopithomyces</i>  | 0.04                   | 0.04  |
| —                        | —                      | —    | <i>Nigrospora</i>        | 0.03                   | 0.15  |

|   |   |   |                        |      |      |
|---|---|---|------------------------|------|------|
| — | — | — | <i>Itersonilia</i>     | 0.03 | 0.01 |
| — | — | — | <i>Scolecobasidium</i> | 0.02 | 0.40 |
| — | — | — | <i>Bulleromyces</i>    | 0.02 | 0.01 |
| — | — | — | <i>Symmetrospora</i>   | 0.02 | 0.07 |
| — | — | — | <i>Mycosphaerella</i>  | 0.01 | 0.03 |
| — | — | — | <i>Periconia</i>       | 0.01 | 0.03 |
| — | — | — | <i>Pestalotiopsis</i>  | 0.01 | 0.24 |
